# Supplementary material for: Activity and kinetics of ruthenium supported catalysts for sodium borohydride hydrolysis to hydrogen
Source: Royal Society of Chemistry journal article supplement (doi:10.1039/c6ra00747c), 2016-01-01
Supplement: c6ra00747c1.pdf [file c6ra00747c1.pdf]

## Supporting information

# Activity and Kinetics of Ruthenium Supported Catalysts for Sodium Borohydride Hydrolysis to Hydrogen

Yunhua Li,<sup>a,\*</sup> Xing Zhang<sup>a</sup>, Qi Zhang<sup>a</sup>, Jinbao Zheng<sup>a</sup>, Nouwei Zhang<sup>a</sup>, Bing H Chen<sup>a</sup>, Kevin J. Smith<sup>b</sup>

<sup>a</sup> Department of Chemical and Biochemical Engineering, College of Chemistry and Chemical Engineering, National Engineering Laboratory for Green Chemical Productions of Alcohols-Ethers-Esters, Xiamen University, Xiamen 361005, PR China

<sup>b</sup> Department of Chemical and Biological Engineering, University of British Columbia, 2360 East Mall, Vancouver, BC, V6T 1Z3 CANADA

### Material

Carbon supporters were obtained from Cabot Corporation. All other chemicals were analytic grade from Sinopharm Chemical Reagent Co. Ltd. (Shanghai, China) and were used without additional treatment. The water used in all experiments was deionized water.

### Preparation of the precursor Ni/C

In a typical procedure, 0.070 g  $\text{NiCl}_2 \cdot 6\text{H}_2\text{O}$  was dissolved in the mixture with 20.0 mL deionized water and 3.5 mL ethanol. After stirring for 20 min, 3.60 g 0.28 wt.% polyvinylpyrrolidone (PVP) aqueous solution and 7 ml of 85 wt. %  $\text{N}_2\text{H}_4 \cdot \text{H}_2\text{O}$  were added to the above solution. Then 4.00 g 12.5 wt. % NaOH solution was used to adjust pH of the solution. The mixture was vigorously stirred for 0.5 h and then 0.39 g carbon as the supporters also was added. The above mixture sample was transferred into a Teflon autoclave for hydrothermal synthesis at 333 K for 4 h. After cooling the autoclave to room temperature, the black solid was obtained by filtrating and washing with distilled water to remove  $\text{Na}^+$ .

### Characterization of the samples

---

\* Corresponding author: Tel/fax: +86-0592-2185203. E-mail address: yunhuali@xmu.edu.cn

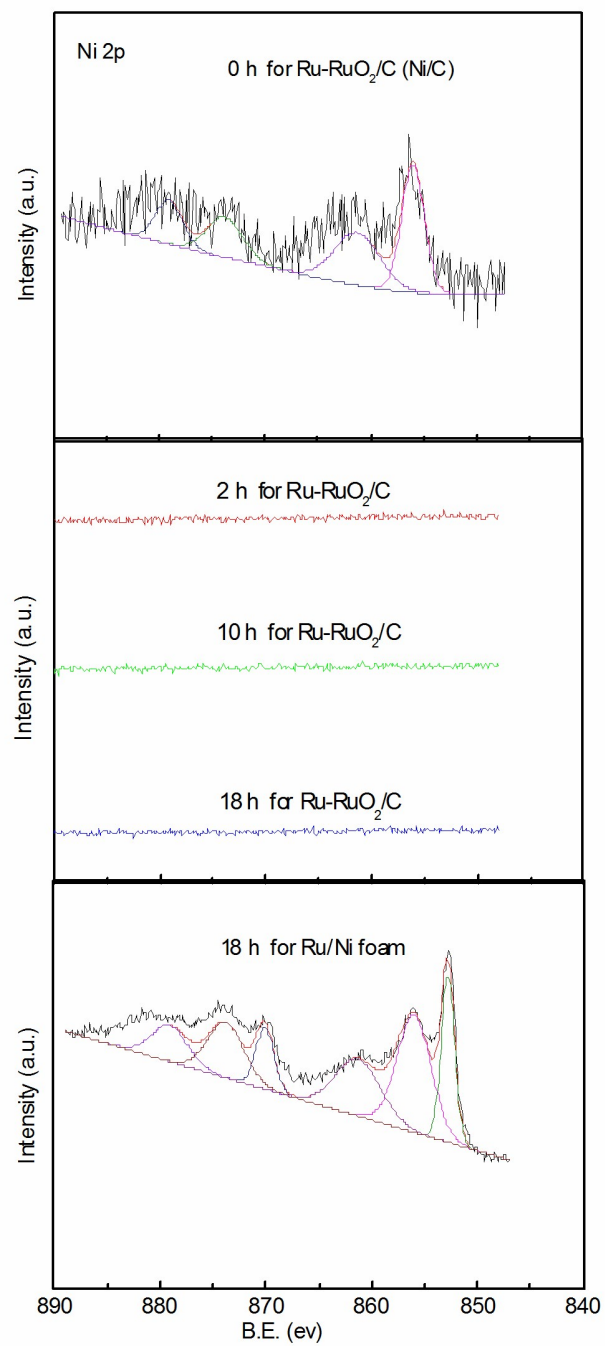

Figure S1 Ni2p spectrum of Ni/C

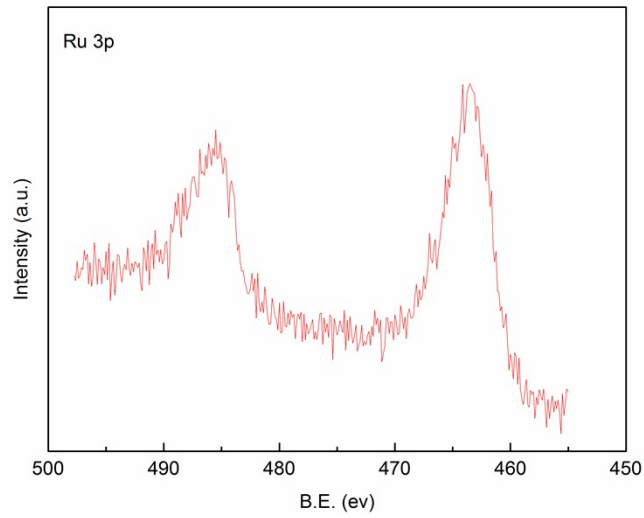

Figure S2 Ru 3p spectrum for NiO impregnated by the RuCl<sub>3</sub> solution

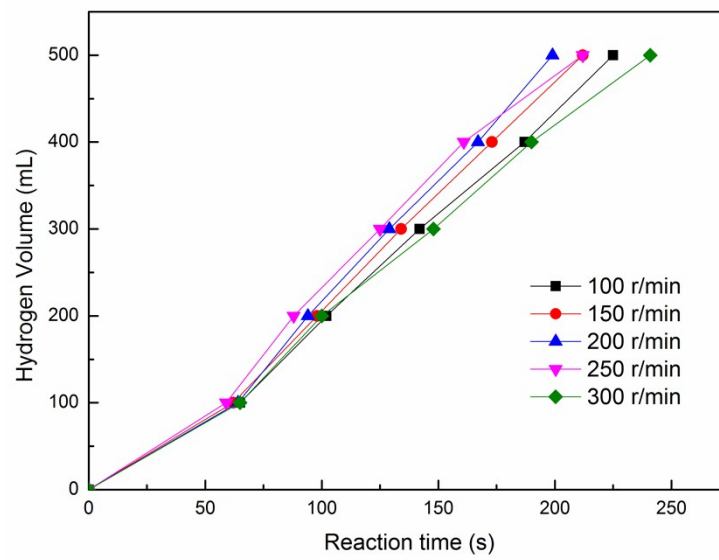

Figure S3 Effect of stirring speed on hydrogen generation
